# Supplementary material for: Graphene‐Tapered ZnO Nanorods Array as a Flexible Antireflection Layer
Source: Hindawi journal article supplement (doi:10.1155/2015/925863), 2015-01-01
Supplement: f1 [file 925863.f1.docx]

Supporting information

**Graphene – tapered ZnO nanorods array**

**as a flexible antireflection layer**

Taeseup Song*

*School of Materials Science and Engineering, Yeungnam University,*

*Gyeongsan 712-749, Korea*

Corresponding Author* [tsong@yu.ac.kr](mailto:tsong@yu.ac.kr)

**Figure S1**

Figure S1. Raman data for graphene – tapered ZnO nanorods array on the flat and rough PDMS substrates.
